# Supplementary material for: Differences in Striatal Metabolism in [18F]FDG PET in Parkinson’s Disease and Atypical Parkinsonism
Source: MDPI journal article supplement (doi:10.3390/diagnostics13010006), 2022-12-20
Supplement: s1 [file s1]

**Table S1.** *P*-values of *post-hoc* analyses comparing striatal SUVRs of types of atypical parkinsonism for regions with statistically significant differences in one-way ANOVA or Kruskal-Wallis tests. Statistically significant differences are given in **bold**.

| Region   |       | PSP -<br>CBD | PSP -<br>MSA | PSP -<br>DLB | PSP -<br>NC | CBD -<br>MSA | CBD -<br>DLB | CBD -<br>NC | MSA -<br>DLB | MSA -<br>NC  | DLB -<br>NC |
|----------|-------|--------------|--------------|--------------|-------------|--------------|--------------|-------------|--------------|--------------|-------------|
| Caudate  | L     | 1.000        | 0.470        | 1.000        | 0.577       | 0.703        | 1.000        | 0.638       | 0.104        | <b>0.035</b> | 1.000       |
|          | R     | 1.000        | 0.839        | 1.000        | 0.124       | 1.000        | 1.000        | 0.166       | 0.148        | <b>0.011</b> | 1.000       |
| Striatum | L     | 1.000        | 0.252        | 1.000        | 1.000       | 1.000        | 1.000        | 0.315       | 0.097        | <b>0.037</b> | 1.000       |
|          | R     | 1.000        | 0.337        | 1.000        | 0.130       | 1.000        | 1.000        | 0.052       | 0.170        | <b>0.008</b> | 0.532       |
|          | Whole | 1.000        | 0.666        | 1.000        | 1.000       | 1.000        | 1.000        | 0.279       | 0.196        | 0.060        | 1.000       |
